# Supplementary material for: Structure and efficient luminescence upconversion of Ln(iii) aromatic N-oxide coordination polymers
Source: Royal Society of Chemistry journal article supplement (doi:10.1039/c6dt01828a), 2016-01-01
Supplement: c6dt01828a1.pdf [file c6dt01828a1.pdf]

# Structure and Efficient Luminescence Upconversion of Ln(III) Aromatic N-Oxide Coordination Polymers

Bowie S. K. Chong and Evan G. Moore\*

*\*School of Chemistry and Molecular Biosciences, The University of Queensland, Brisbane, QLD 4072, Australia.*

*E-mail: [egmoore@uq.edu.au](mailto:egmoore@uq.edu.au);*

*Fax: +61 (0) 7 3365 4273; Tel: +61 (0) 7 3365 3862*

## Contents:

- 1. Additional Details of Crystallographic Analysis**
- 2. Near Infra-Red (NIR) Emission and Excitation Data**

## 1. Additional Details of Crystallographic Analysis

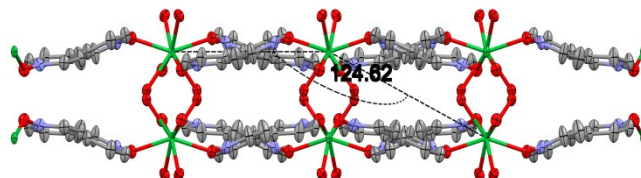

| Samples     | Angle 1 |
|-------------|---------|
| 0%Er-100%Yb | 124.62  |
| 5%Er-95%Yb  | 124.67  |
| 20%Er-80%Yb | 124.71  |
| 50%Er-50%Yb | 124.72  |
| 100%Er-0%Yb | 124.76  |

Selected bond angles in  $\{[\text{Yb}_{1-x}\text{Er}_x(4,4'\text{-bpdo})_3(\text{H}_2\text{O})_2](\text{CF}_3\text{SO}_3)_3\}_\infty$  coordination polymers: Angle 1 between the layers along the a-axis.

| Samples     | Experimental Average<br>$\text{LnO}_{\text{ligand}}$ Distance |
|-------------|---------------------------------------------------------------|
| 0%Er-100%Yb | 2.3000(5)                                                     |
| 5%Er-95%Yb  | 2.3007(4)                                                     |
| 20%Er-80%Yb | 2.3037(4)                                                     |
| 50%Er-50%Yb | 2.3087(4)                                                     |
| 100%Er-0%Yb | 2.3187(4)                                                     |

Calculated average experimental bond length of the Ln(III) metal with the oxygen atom from the 4,4'-bpdo ligands.

## 2. Near Infra-Red (NIR) Emission and Excitation Data

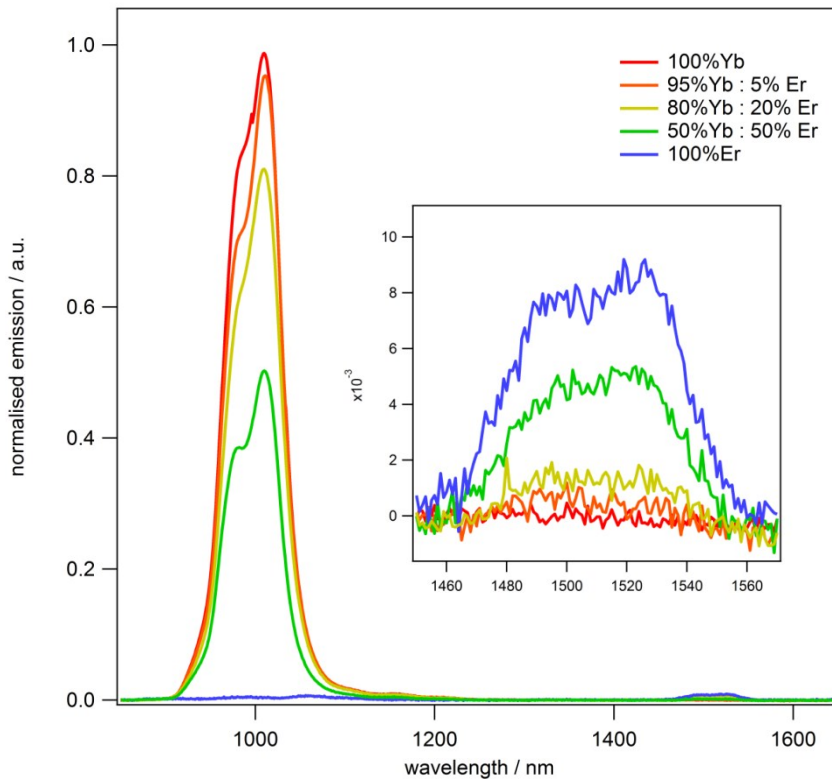

**FigS1.** Observed NIR emission for solid powdered samples of (1) to (5) upon 360 nm excitation at room temperature.

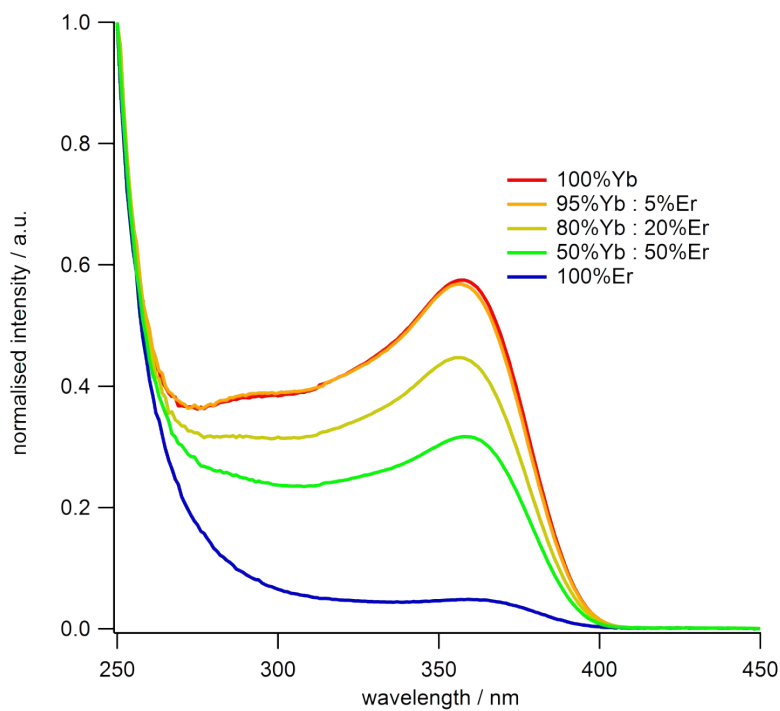

**FigS2.** Excitation spectra for solid powdered samples of (1) to (4) monitored at 980nm and (5) monitored at 1520nm.
